# Supplementary material
Source: publisher site journal article supplement (https://www.spandidos-publications.com/8613/downloadSupplementary)

Figure S1. LMW-AP-FBG treatment decreased the viability of various cancer cell types. Proliferation of nine distinct cancer cell lines following 24 h exposure to LMW-AP-FBG. Data represent mean  $\pm$  SEM from three independent experiments (n=3). \*P<0.05 and \*\*\*P<0.001 compared with the control (0 mg/ml). LMW-AP-FBG, low-molecular-weight  $\beta$ -glucan isolated from *Aureobasidium pullulans*.

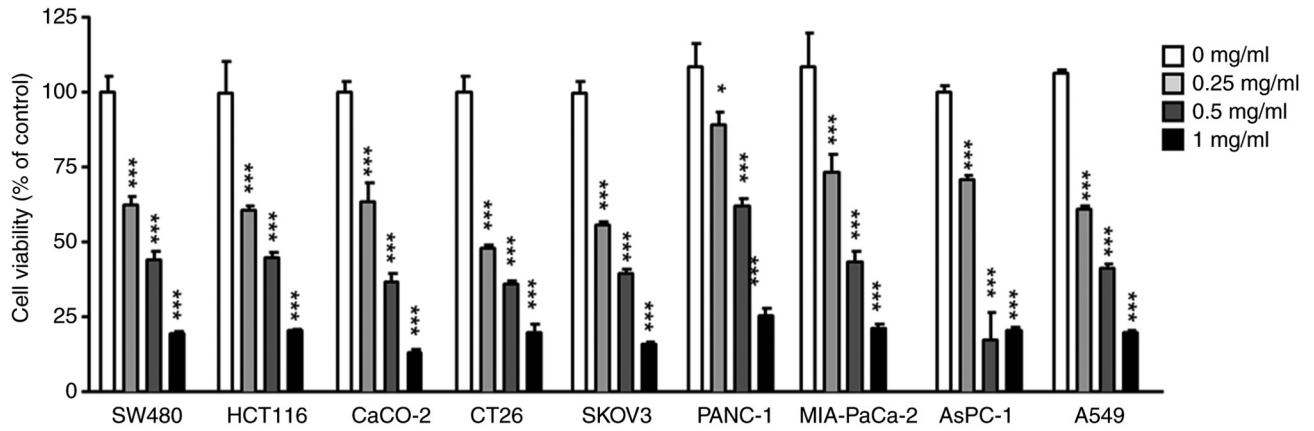

Figure S2. Effects of LMW-AP-FBG on the nuclear translocation of AIF in SW480 cells. Representative Western blots show the expression levels of AIF after 48 h of treatment with various concentrations of LMW-AP-FBG in the (A) nuclear and (B) cytosolic fractions. Quantitative analysis of the relative protein levels is presented in the accompanying bar graphs. LMW-AP-FBG, low-molecular-weight  $\beta$ -glucan isolated from *Aureobasidium pullulans*; AIF, apoptosis-inducing factor.

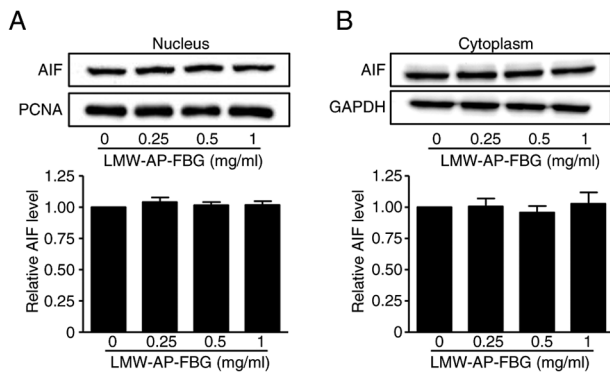

Supplement: Supplementary file 1 [file downloadSupplementary]
